# Supplementary material for: Population-Based Molecular Prognosis of Breast Cancer by Transcriptional Profiling
Source: Oxford University Press journal article supplement (doi:10.1158/1078-0432.ccr-06-2222), 2007-04-01
Supplement: 10780432ccr062222-sup-supplementary_data.pdf [file 10780432ccr062222-sup-supplementary_data.pdf]

Supplementary Data for

## **Population-based Molecular Prognosis of Breast Cancer by Transcriptional Profiling**

Yan Ma, Yong Qian, Liang Wei, Jame Abraham, Xianglin Shi, Vincent Castranova, E. James Harner, Daniel C. Flynn, and Lan Guo

### Table of Contents

|                                        |    |
|----------------------------------------|----|
| 1 Experimental Database .....          | 2  |
| 1.1 Training Data Source .....         | 2  |
| 1.2 Training Data Pre-processing ..... | 2  |
| 1.3 Validation Data Sources .....      | 2  |
| 2. Study Design.....                   | 2  |
| 3. Random Forests .....                | 3  |
| 4. Linear Discriminant Analysis .....  | 6  |
| 5. Time-dependent ROC Curves.....      | 8  |
| 6. Determine Risk Groups.....          | 11 |
| References.....                        | 15 |

### Supplementary Figures

|                                                                                             |    |
|---------------------------------------------------------------------------------------------|----|
| Figure S1. Feature selection using random forests.. .....                                   | 5  |
| Figure S2. The accuracy of 28-gene disease-free survival signature on three data sets... .. | 10 |
| Figure S3. The 28-gene signature is used to predict overall survival.....                   | 11 |
| Figure S4. Kaplan-Meier analysis of disease-free survival of three risk groups. ....        | 13 |

### Supplementary Tables

|                                                                                                                  |    |
|------------------------------------------------------------------------------------------------------------------|----|
| Table S1. Summary of feature selection processes for each prediction model. ....                                 | 4  |
| Table S2. A 28-gene signature achieves 92% accuracy in predicting the relapse status .....                       | 6  |
| Table S3. A 14-gene signature achieves 80% accuracy in predicting nodal status. ....                             | 7  |
| Table S4. A 9-gene signature achieves 85% accuracy in predicting tumor grade .....                               | 8  |
| Table S5. Clinical characteristics of each risk group (Sotiriou et al.(1)).....                                  | 12 |
| Table S6. Clinical characteristics of each risk group (van't Veer et al. (3)).....                               | 12 |
| Table S7. Clinical characteristics of each risk group (Sorlie et al.(2)) .....                                   | 12 |
| Table S8. The association between risk groups and clinical-pathological parameters in three patient cohorts..... | 14 |
| Table S9. Breast cancer therapeutic benefits assessment. ....                                                    | 14 |

# 1 Experimental Database

## 1.1 Training Data Source

The gene expression and clinical data from Sotiriou *et al.* (1) were used as training set. There were 7,650 genes assayed by cDNA microarrays on 99 patient samples. All of the tumors were invasive ductal carcinomas: 46 patients were node negative and 53 were node positive (please refer to the original paper for the details). The data were publicly available as the *supporting information* on the PNAS website: <http://www.pnas.org/cgi/content/full/100/18/10393>.

## 1.2 Training Data Pre-processing

The data pre-processing of the training set consists of two steps: (1) remove genes with more than five missing values across all the samples. In this step, 559 genes were eliminated, and (2) replace missing values by using the *EMV* package in software *R* (<http://www.r-project.org>). Missing values were estimated based on a *k-nearest-neighbor* algorithm ( $k = 20$ ). This algorithm first selects  $k$  nearest genes that do not contain any missing values to the one containing at least one missing value, based on the Euclidean distance. Then, the missing values are replaced by the average of the neighbors. After the data pre-processing was performed, 7,091 genes remained in the data set.

## 1.3 Validation Data Sources

Two validation data sets were used in our analysis. One was from a publication by Sorlie *et al.* (2), which is available from the website: [http://smd.stanford.edu/cgi-bin/publication/viewPublication.pl?pub\\_no=95](http://smd.stanford.edu/cgi-bin/publication/viewPublication.pl?pub_no=95). The data set in Sorlie *et al.* (2) includes 9,216 genes screened on 78 patient samples. We used the expression profiles of 58 patients in our model validation. The remaining cases were not included because patient disease-free survival information was not available.

The other data set was from van't Veer *et al.* (3), which is available at: <http://www.rii.com/publications/2002/vantveer.html>. This data set contains 24,500 genes screened on 98 patient samples. In the studied cohort, 34 patients developed metastasis within 5 years and 44 patients continued to be disease-free after five years. In addition, there were 18 patients with BRCA1 germline mutations and two BRCA2 carriers. In our validation, we used the cohort of 78 patients, excluding 20 patients with BRCA mutations.

# 2. Study Design

We built a prediction model for each of three prognostic factors: relapse/metastases potential (relapse/metastases within five years vs. disease-free in five years), nodal status (node negative vs. node positive), and tumor grade (grade 1/2 vs. 3). Using the data set from Sotiriou *et al.* (1),

the classification models for nodal status and tumor grade were constructed based on the expression levels of 7,091 genes (after pre-processing) on 99 clinical specimens. The prediction model for 5-year disease-free survival was built on 96 clinical samples, omitting 3 patients whose 5-year relapse-free survival could not be determined.

Marker genes from these prognostic models were identified by using a combination of Random Forests of software *R* (<http://www.r-project.org>) and Linear Discriminant Analysis of Software SAS (<http://www.sas.com/>). Random forests were first used to select a small subset of genes, and then, Linear Discriminant Analysis was used to further refine the gene signatures. Feature selection is important to identify relevant and important genes and to remove irrelevant genes and noise from large scale microarray data sets. The random forests algorithm (4) utilizes an ensemble of classification trees. Random forests are characterized as an effective machine learning method for processing noisy large-scale data sets. Therefore, we employed this algorithm to filter out non-informative genes sequentially until a small subset of genes was obtained. Then, SAS PROC STEPDISC procedure for Linear Discriminant Analysis was used to further filter out more genes. Backward elimination in PROC STEPDISC selected a much smaller subset of genes that generated favorable prediction accuracy. The details of both random forests and discriminant analysis are described in the following sections.

### 3. Random Forests

Random forests are a generalization of the standard tree algorithms (5). The random forests (4) algorithm is an ensemble of un-pruned classification trees. The basic step of random forests is to form *diverse* base tree classifiers from a single training set. Two sources of randomness are introduced: (1) each tree is built upon a bootstrap sample (a random sample taken with replacement) from the training set. Bootstrapping generates diverse versions of training data (6), and (2) only a subset of variables is explored to split each node in the tree. Therefore, the optimal split of a single node is based on a random subset of the variables instead of the whole variables set. Each tree generates its own classification rules. The classification decision for a given input case is made by majority voting over all trees.

About one-third of the cases in the bootstrap sample are not used to construct a classification tree. These samples are called *out-of-bag (OOB)* cases. For each tree, the OOB cases are used to get a classification result. For each sample in the training set, the final classification of the forest is the class having the most votes from the bootstrapped OOB cases. Comparison between this classification and the real class label in the data generates an unbiased estimator of the error rate. Therefore, random forests do not need a separate test set or additional cross-validation to evaluate its results (4).

A very important function of random forests is variable importance evaluation. The importance of a variable is defined in terms of its contribution to classification accuracy. Based on the variable importance measure, backward elimination was performed to identify the gene subset with the smallest OOB error rate. Here, the OOB error rate was not used to assess the prediction

accuracy of the identified gene subsets. Instead, it served as a stopping rule for feature selection. The *varSelRF* package of *R* (7) was used according to the following steps:

- (1). Build a forest with  $N$  trees and obtain a ranking of variable importance
- (2). Remove 20% of the least important variables
- (3). Construct a new forest with  $K$  trees
- (4). Repeat steps (2) and (3) until two genes are left
- (5). Select the gene subset with the smallest OOB error rate

In the experiments, we chose  $N = 3,000$  and  $K = 1,000$  because a large number of trees in the initial forest is likely to produce stable importance measures (7). We did not follow the “1-Standard Error (1-SE) rule” as suggested by Diaz-Uriarte *et al.* (7). This rule chooses the smallest gene subset, whose error rate is within one standard error of the minimum error rate of all forests. We used the “0-Standard Error (0-SE) rule”, which identifies the gene subset with the smallest OOB error rate. The “0-SE rule” usually selects more genes than the “1-SE rule”. Since further gene filtering would be pursued by using Linear Discriminant Analysis, we chose the gene subsets with the lowest prediction error for modeling disease-free survival, nodal status, and tumor grade (Table 1). Figure 1 shows the feature selection process in each model by using random forests.

**Table S1.** Summary of feature selection processes for each prediction model. The discriminant function was used to compute the prediction accuracies.

| Model                                                  | # of Genes<br>Obtained<br>Using<br>Random<br>Forests | # of Genes<br>Obtained Using<br>SAS PROC<br>STEPDISC | Accuracy       | Sensitivity    | Specificity    |
|--------------------------------------------------------|------------------------------------------------------|------------------------------------------------------|----------------|----------------|----------------|
| <b>5-Year-Relapse</b><br>(relapse vs.<br>relapse-free) | 66                                                   | 29                                                   | 92%<br>(88/96) | 90%<br>(53/59) | 95%<br>(35/37) |
| <b>Nodal Status</b><br>(positive vs.<br>negative)      | 42                                                   | 14                                                   | 80%<br>(79/99) | 83%<br>(44/53) | 76%<br>(35/46) |
| <b>Tumor Grade</b><br>(grade 1/2 vs. 3)                | 18                                                   | 9                                                    | 85%<br>(84/99) | 87%<br>(39/45) | 83%<br>(45/54) |

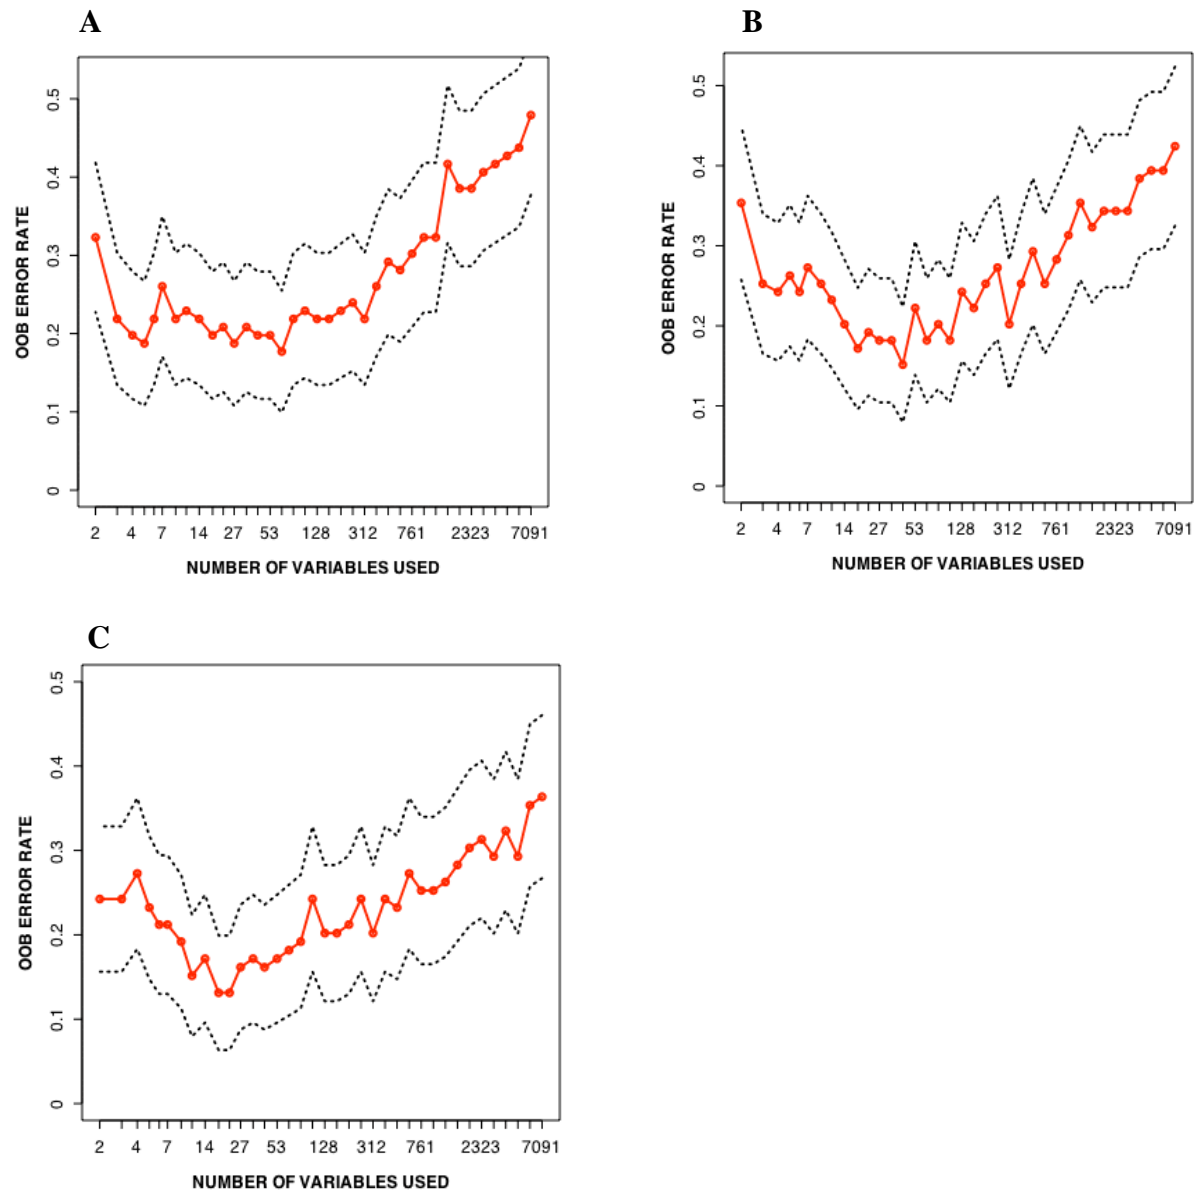

**Figure S1.** Feature selection using random forests. In each panel, the red line indicates the OOB error rate (vertical axis) at different number of genes (horizontal axis). The two dashed lines are two standard errors above/below the error rates. A. Disease-free survival; B. Nodal Status; C. Tumor Grade.

## 4. Linear Discriminant Analysis

Discriminant analysis was used to determine which variables discriminate two or more naturally occurring groups in prognosis. Given a number of variables as the data representation, each class is modeled as multivariate normal distribution with a covariance matrix and a mean vector. Instances are classified to the label of the nearest mean vector based on Mahalanobis distance. The decision surfaces between classes become linear if the classes have a common covariance matrix.

When the distribution within each group is assumed to be multivariate normal, a parametric method can be used to develop a discriminant function (SAS User's Guide, version 9.1). Such function is determined by a measure of generalized square distance which is based on the pooled covariance matrix as well as the prior probabilities of group membership. The generalized squared distance  $D_i^2(x)$  from input  $x$  to class  $i$  is:

$$D_i^2(x) = d_i^2(x) + g(i)$$

where  $d_i^2(x) = (x - m_i)'V^{-1}(x - m_i)$  is the squared distance from  $x$  to group  $I$ ;  $m_i$  is the  $p$ -dimensional mean vector for group  $I$ ;  $V$  is the pooled covariance matrix; and  $g(i)$  depends on the prior probability of class  $i$ . In practice, the prior probability can be assumed as equal for all groups. In this study, we assumed equal prior probability and thus  $g(i) = 0$ .  $x$  is classified into class  $i$  if  $D_i^2(x)$  is the smallest among all the distance measures.

A common application of discriminant function analysis is feature selection, i.e., determining the attributes that discriminate between classes. In this study, we selected features using a stepwise backward search with SAS PROC STEPDISC. Initially, all variables (i.e., genes) in the subset identified using random forests are included in the model and the variable that contributes the least to the prediction of class membership then is eliminated. By doing so, one would only keep the variables that contribute the most to the discrimination between classes in the model. The final gene subsets obtained from SAS PROC STEPDISC for each prognostic model are shown in *Tables 2-4*. We used leave-one-out cross-validation to assess the prediction accuracy. The classification accuracies based on the final gene set in each model are shown in *Table 1*.

**Table S2.** A 28-gene relapse signature. This gene signature achieves 92% accuracy in predicting the relapse status (relapse vs. relapse-free in a 5-year period). Note: '-' means that the gene name is not available.

| Gene             | Spot ID | Clone_IMAGE | UniGene Cluster ID |
|------------------|---------|-------------|--------------------|
| -                | 3912    | 198917      | Hs.463079          |
| TOMM70A          | 4919    | 198312      | Hs.227253          |
| MCF2             | 2370    | 268412      | Hs.387262          |
| RAD52 Pseudogene | 418     | 1377154     | Hs.552577          |
| MCM2             | 1881    | 239799      | Hs.477481          |

|         |      |        |           |
|---------|------|--------|-----------|
| C18B11  | 5984 | 131988 | Hs.173311 |
| SEC13L  | 6497 | 757210 | Hs.301048 |
| SLC25A5 | 5182 | 291660 | Hs.522767 |
| PLSCR1  | 6959 | 268736 | Hs.130759 |
| TXNRD1  | 7296 | 789376 | Hs.434367 |
| RAD50   | 2925 | 261828 | Hs.242635 |
| -       | 6498 | 46196  |           |
| INPPL1  | 1987 | 703964 | Hs.523875 |
| -       | 583  | 501651 | Hs.439445 |
| TXNRD1  | 6736 | 789376 | Hs.434367 |
| PBX2    | 536  | 80549  | Hs.509545 |
| SSBP1   | 3434 | 125183 | Hs.490394 |
| -       | 2403 | 34396  | Hs.448229 |
| PDGFRA  | 6674 | 376499 | Hs.74615  |
| -       | 6555 | 488202 | Hs.49433  |
| DDOST   | 2416 | 50666  | Hs.523145 |
| -       | 2276 | 182930 | Hs.497723 |
| S100P   | 5593 | 135221 | Hs.2962   |
| FAT     | 7009 | 591266 | Hs.481371 |
| FGF2    | 3514 | 324383 | Hs.284244 |
| INSM1   | 3061 | 22895  | Hs.89584  |
| IRF5    | 5962 | 260035 | Hs.521181 |
| SMARCD2 | 2923 | 741067 | Hs.250581 |
| MAP2K2  | 1652 | 769579 | Hs.465627 |

**Table S3.** A 14-gene signature achieves 80% accuracy in predicting nodal status (positive vs. negative).

| Gene     | SPOT ID | Well ID | Clone IMAGE | UniGene Cluster ID |
|----------|---------|---------|-------------|--------------------|
| TLR5     | 1635    | 208694  | 277229      | Hs.114408          |
| FLJ21128 | 2062    | 207691  | 279077      | Hs.96852           |
| RBMX     | 2159    | 202137  | 841352      | Hs.380118          |
| -        | 3303    | 27894   | 955999      | Hs.522309          |
| HOXD1    | 3607    | 202214  | 342593      | Hs.83465           |
| -        | 3735    | 26914   |             |                    |
| -        | 4151    | 209569  | 50635       | Hs.390738          |
| VEGFB    | 4777    | 28189   | 167296      | Hs.78781           |
| STK12    | 4825    | 28957   | 241029      | Hs.442658          |
| MAPK12   | 5195    | 27254   | 309482      | Hs.432642          |
| BIRC3    | 6757    | 150040  | 428231      | Hs.127799          |
| ITGA7    | 6932    | 208400  | 377671      | Hs.524484          |

|        |      |        |        |           |
|--------|------|--------|--------|-----------|
| CHC1L  | 7058 | 200264 | 768316 | Hs.25447  |
| SCYB14 | 7385 | 207798 | 345034 | Hs.483444 |

**Table S4.** A 9-gene signature achieves 85% accuracy in predicting tumor grade (grade 1/2 vs. 3).

| Gene    | SPOT ID | Well ID | Clone IMAGE | UniGene Cluster ID   |
|---------|---------|---------|-------------|----------------------|
| ALDH3A2 | 879     | 27777   | 767804      | Hs.499886            |
| NK4     | 1509    | 201566  | 810859      | Hs.943               |
| BUB1    | 3087    | 208790  | 781047      | Hs.469649            |
| RUNX1   | 3928    | 201479  | 773215      | Hs.149261, Hs.278446 |
| ZSIG37  | 4160    | 209599  | 78844       | Hs.201398            |
| SSI-1   | 5865    | 201673  | 712668      | Hs.50640             |
| HDAC2   | 6713    | 28381   | 712866      | Hs.3352              |
| HMG2    | 2353    | 28253   | 341782      | Hs.434953            |
| NFIX    | 3177    | 200222  | 754600      | Hs.257970            |

## 5. Time-dependent ROC Curves

Both sensitivity and specificity are the most widely used statistics to describe a diagnostic test. Sensitivity measures the probability of a positive test among patients with disease, while specificity quantifies the chance of a negative test among patients without disease. Receiver operating characteristics (ROC) curve displays *1 - specificity* vs. *sensitivity* of a diagnostic marker for a binary disease variable. ROC analysis interprets the predictive power of a diagnostic test. A good diagnostic test is supported by a marker which is powerful in distinguishing between the two classes of the disease variable. Since many disease outcomes vary over time, time-dependent ROC analysis extends the concepts of sensitivity, specificity, and ROC curves for time-dependent binary disease variables in censored data.

In our study, the binary disease variable  $R_i(t) = 1$ , if patient  $i$  has recurrent or metastatic breast cancer prior to time  $t$ ; otherwise,  $R_i(t) = 0$ . For a diagnostic marker  $M$ , both sensitivity and specificity are defined as a function of time  $t$ :

$$sensitivity(c, t) = P\{M > c \mid R(t) = 1\}$$

$$specificity(c, t) = P\{M \leq c \mid R(t) = 0\}$$

A  $ROC(t)$  is a function of  $t$  at different cutoffs  $c$ . A time-dependent ROC curve is a plot of  $1 - specificity(c, t)$  vs.  $sensitivity(c, t)$ . The area under the ROC curve (AUC) is used as an accuracy measure of the ROC curve. A higher prediction accuracy is evidenced by a larger  $AUC(t)$  (8;9).



We identified a 28-gene relapse signature from the training set (1). Five-year disease-free survival prediction accuracy of the 28-gene signature was 0.983 on the training set (1), 0.843 on one validation set from van't Veer *et al.* (3), and 0.764 on another validation set from Sorlie *et al.* (2). A Cox proportional hazards model (10) was built upon the signature and the risk score was used for constructing the time-dependent ROC curve on the training data (*Figure 2 A*). *Figure 2 C* shows the evolution of the AUC in the time cause on the training data. The horizontal dashed line indicates the AUC of a weak classifier ( $AUC = 0.50$ ). The vertical dashed line indicates the 5-year cutoff. To validate the discriminatory power of our identified gene signature, two validation sets were used. From each validation set, we identified the genes that are common to our 28-gene signature. Eight genes were found in the data generated by Sorlie *et al.* (2), including one unknown gene. We used Unigene Cluster ID to search for the common genes in this data set, such that unknown genes without any gene names could be identified. Twenty-five genes were obtained from the data generated by van't Veer *et al.* (3), in which four genes were duplicated. Since no Unigene Cluster ID was available in this data set, we used gene names to identify overlapped genes, and found that four genes appeared twice. The time-dependent ROC curves based on these two validation data sets are demonstrated in *Figure 2B*; the AUC vs. time is shown in *Figure 2D*.

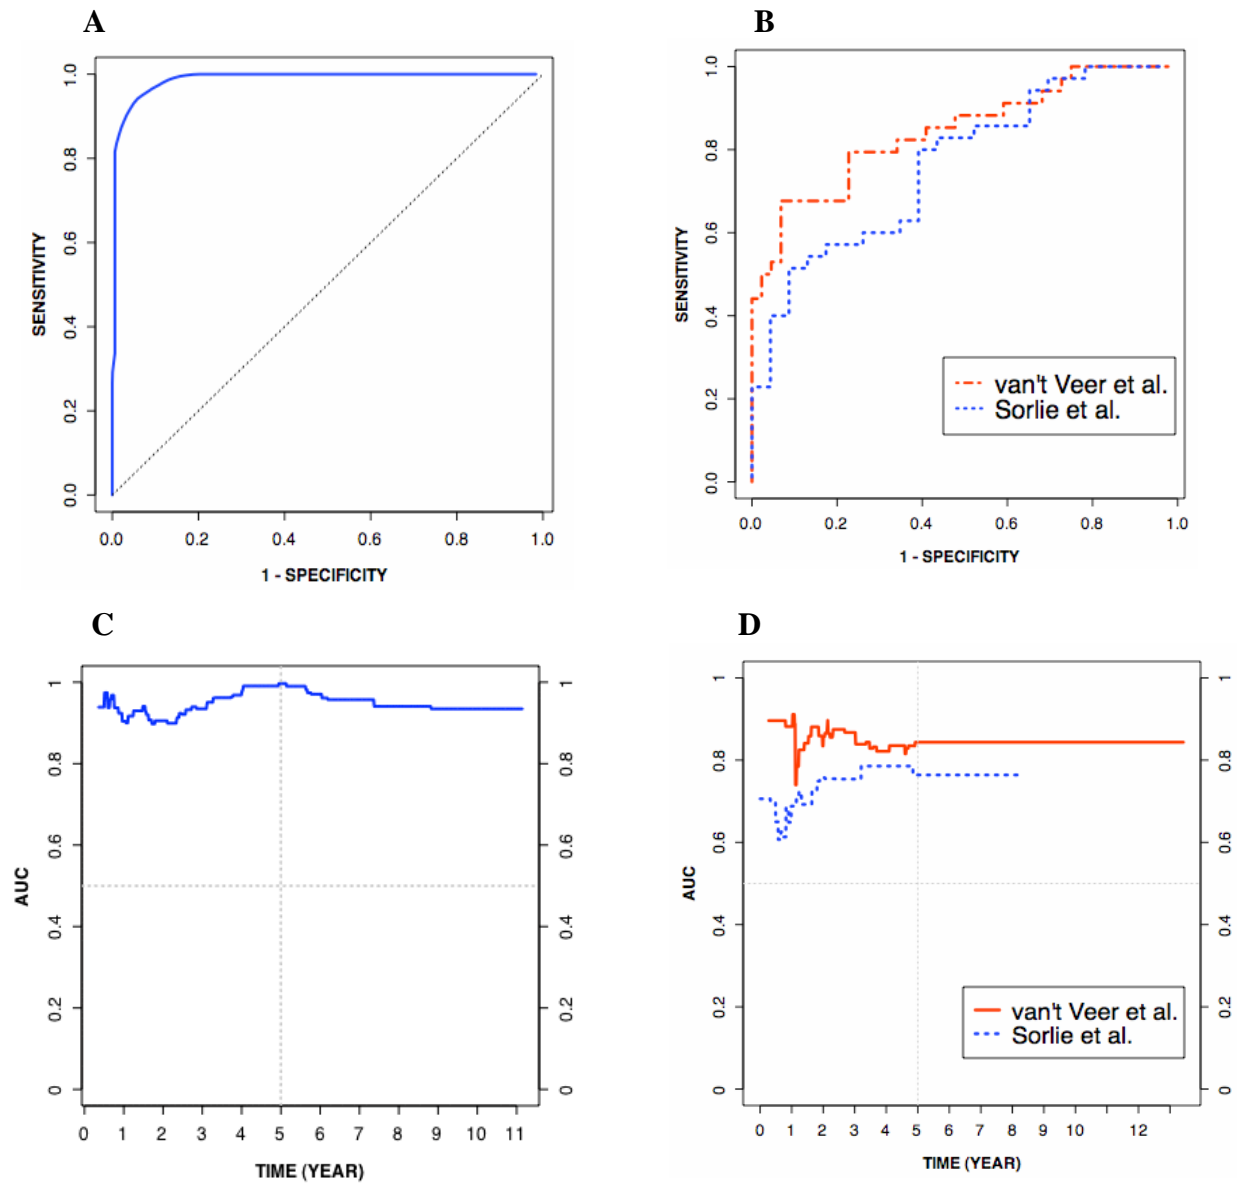

**Figure S2.** Time dependent ROC analyses of the 28-gene signature in disease-free survival prediction on three patient cohorts.

A. Time dependent ROC ( $t = 5$  years) curve of the 28-gene signature on the training set generated by Sotiriou *et al.*(1) AUC = 0.983.

B. Time-dependent ROC ( $t = 5$  years) curves of the 28-gene signature on two validation sets. AUC = 0.843 with the 25 overlapping genes on the set from van't Veer *et al.*(3); AUC = 0.764 with 8 overlapping genes on the set from Sorlie *et al.* (2).

C. Area under the ROC curve in year 1 to year 11 on the training set (1).

D. Area under the ROC curve in year 1 to year 13 on the two validation data sets (2;3).

This 28-gene signature is also predictive of overall survival. Using time-dependent ROC analyses for overall survival time, the prediction accuracy of the 28-gene signature was 0.927 on the training set (1) (*Figure 3 A*) and 0.808 on the validation set generated by Sorlie *et al.* (2) (*Figure 3 B*).

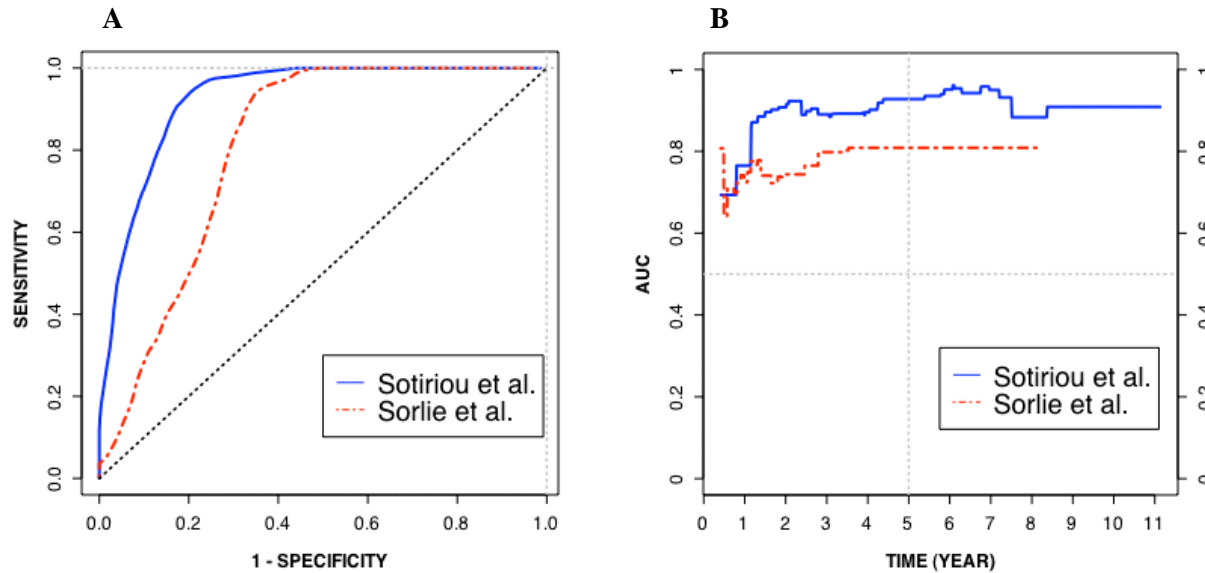

**Figure S3.** Time dependent ROC analyses of the 28-gene signature in the prediction of overall survival. A. Time-dependent ROC curves at time = 5 years (Sotiriou et al: AUC = 0.927; Sorlie et al: AUC = 0.808). B. the area under the ROC curve (AUC) at different time points.

## 6. Determine Risk Groups

To assess a breast cancer patient's relapse and metastatic potential, risk scores were generated by using a Cox model of the 28-gene signature, independent of clinical-pathological parameters. A large value of the risk scores indicates a high risk of relapse/metastases, while a small value indicates a lower risk of breast cancer relapse. Our 28-gene signature obtained from the training set (1) was fitted into a Cox regression model as covariates. To avoid overfitting, we randomly split the data set into two subsets – one was used to define risk groups by fitting the model and obtaining the risk score cutoffs; the other subset was used to validate the cutoffs for defining the risk groups. The distribution of the risk scores from the training subset was used to divide the patients into three groups: high-risk, low-risk, and intermediate-risk. The cutoffs defined in the training subset were used to separate the patients in the test subset into high, low and intermediate risk groups.

The percentage of patients categorized into high, low, or intermediate risk group was 39%, 26%, and 35%, respectively. Table 5 displays the clinical characteristics of each risk group, including average relapse-free days, ER status, Her2/neu overexpression, nodal status, age, tumor size, and treatment received on the data from Sotiriou *et al.*(1). Same analysis was applied to the two validation sets. Table 6 summarizes the clinical characteristics of each risk group, including average metastases-free days, ER and PR status, age, tumor size, and tumor grade on the data from van't Veer *et al.* (3). Table 7 summarizes the clinical characteristics of each risk group, including average relapse-free days, ER status, age, and tumor grade on the data from Sorlie *et al.*(2). Kaplan-Meier analyses showed that disease-free survival was significantly different for each risk group in all three data sets ( $p < 0.005$ , log-rank test; Figure 4).

**Table S5.** Clinical characteristics of each risk group (Sotiriou *et al.*(1))

| <b>Risk Group</b> | <b>Average RFS (days)</b> | <b>% of Age <math>\geq</math> 50 yrs</b> | <b># of Her-2/neu positive cases</b> | <b>% of Tumor Size <math>&gt; 2</math>cm</b> | <b>% of Positive Nodal Status</b> | <b>% of Chemo</b> | <b>% of Hormone</b> | <b>% of ER +</b> |
|-------------------|---------------------------|------------------------------------------|--------------------------------------|----------------------------------------------|-----------------------------------|-------------------|---------------------|------------------|
| High              | 969                       | 82%                                      | 6                                    | 82%                                          | 67%                               | 38%               | 79%                 | 54%              |
| Intermediate      | 2407                      | 73%                                      | 1                                    | 58%                                          | 50%                               | 35%               | 85%                 | 58%              |
| Low               | 2781                      | 65%                                      | 0                                    | 47%                                          | 41%                               | 24%               | 74%                 | 85%              |

**Table S6.** Clinical characteristics of each risk group (van't Veer *et al.* (3))

| <b>Risk Group</b> | <b>% of Patients</b> | <b>Average RFS (days)</b> | <b>% of Age <math>\geq 50</math></b> | <b>% of tumor size <math>&gt; 2</math> cm</b> | <b>% of ER +</b> | <b>% of PR +</b> | <b>% of Tumor Grade 3</b> |
|-------------------|----------------------|---------------------------|--------------------------------------|-----------------------------------------------|------------------|------------------|---------------------------|
| High              | 27%                  | 884                       | 33%                                  | 67%                                           | 57%              | 38%              | 81%                       |
| Intermediate      | 33%                  | 2284                      | 19%                                  | 42%                                           | 96%              | 88%              | 77%                       |
| Low               | 40%                  | 2988                      | 32%                                  | 32%                                           | 77%              | 71%              | 42%                       |

**Table S7.** Clinical characteristics of each risk group (Sorlie *et al.* (2))

| <b>Risk Group</b> | <b>% of Patients</b> | <b>Average RFS (days)</b> | <b>% of Age <math>\geq 50</math></b> | <b>% of ER +</b> | <b>% of Tumor Grade 3</b> | <b>% of T3/T4 Tumors</b> |
|-------------------|----------------------|---------------------------|--------------------------------------|------------------|---------------------------|--------------------------|
| High              | 28%                  | 553                       | 50%                                  | 69%              | 81%                       | 94%                      |
| Intermediate      | 32%                  | 801                       | 84%                                  | 89%              | 26%                       | 89%                      |
| Low               | 40%                  | 1376                      | 70%                                  | 73%              | 32%                       | 77%                      |

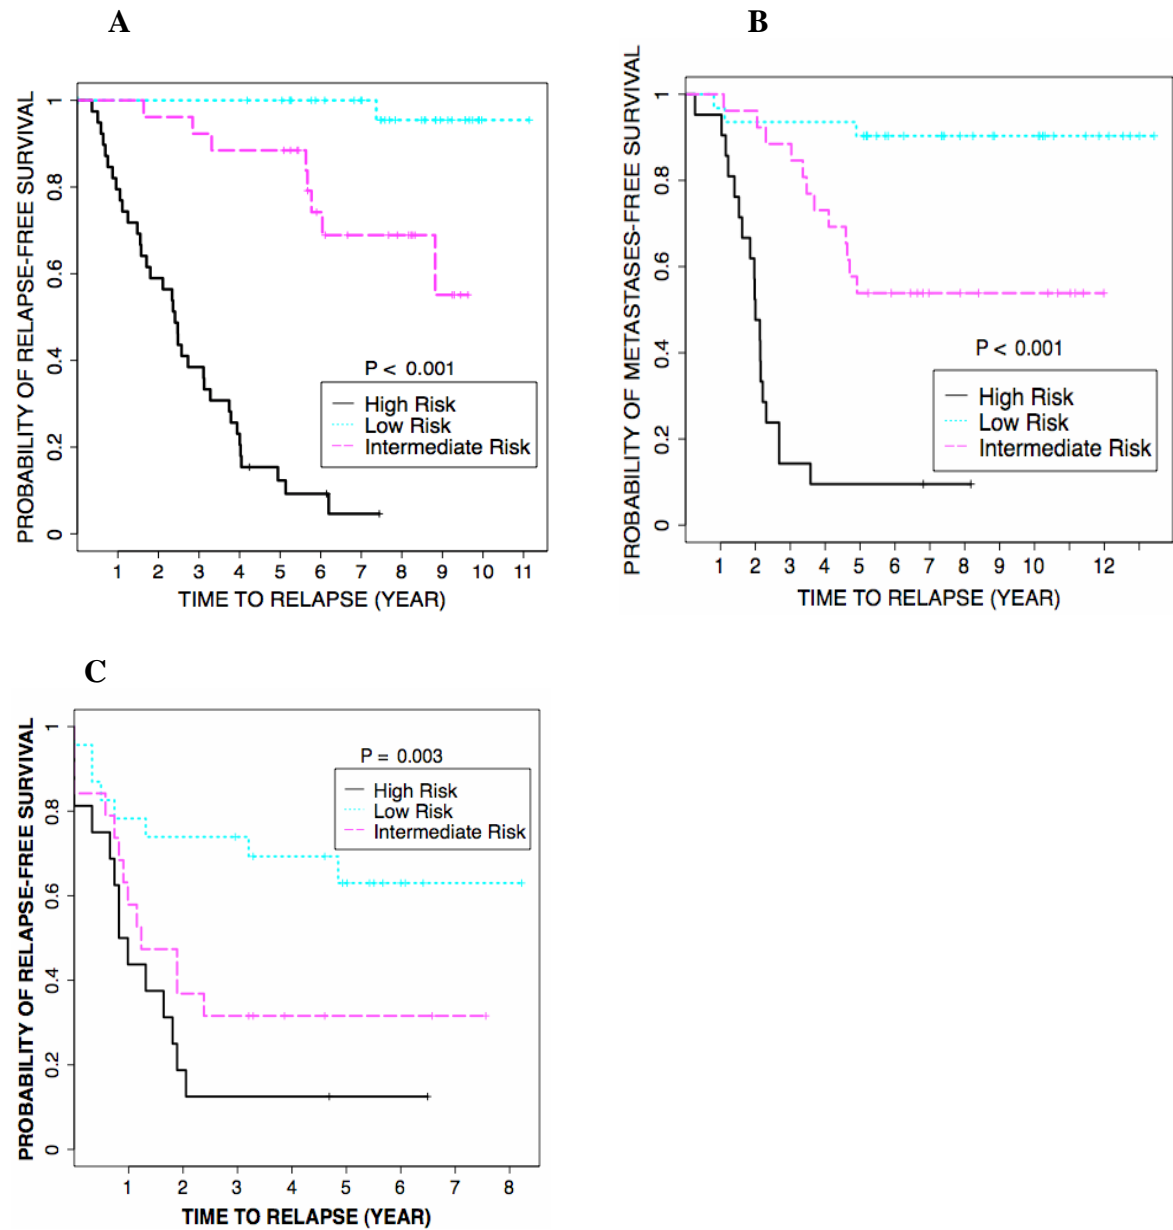

**Figure S4.** Kaplan-Meier analysis of disease-free survival of three risk groups in three patient cohorts. A. Kaplan-Meier analysis on data from Sotiriou *et al.* (1). B. Kaplan-Meier analysis on data from van't Veer *et al.*(3). C. Kaplan-Meier analysis on data from Sorlie *et al.*(2).

In this study, we also evaluated the association between the risk groups and the clinical-pathological parameters on three data sets (1-3) by using either Chi-square test or Fisher's exact test. Chi square test was used, if its assumptions were satisfied. Otherwise, Fisher's test was used. Table 8 reports the *P* values resulted from the tests. The results indicated that our identified 28-gene relapse/metastases signature was indicative of the clinical parameters including tumor size, grade, ER/PR status, and Her2/neu overexpression.

**Table S8.** The association between risk groups and clinical-pathological parameters in three patient cohorts.

| <i>P</i> Values                          |                            |                              |                          |
|------------------------------------------|----------------------------|------------------------------|--------------------------|
| Risk Groups vs.                          | Sotiriou <i>et al.</i> (1) | van't Veer <i>et al.</i> (3) | Sorlie <i>et al.</i> (2) |
| Age <sup>1</sup><br>(<50 yrs or ≥ 50yrs) | 0.243                      | 0.458                        | 0.095                    |
| Tumor size<br>(<2 cm or >2cm)            | 0.006*                     | 0.047*                       |                          |
| Tumor grade<br>(1/2 vs. 3)               | 0.041*                     | 0.004*                       | 0.001*                   |
| ER status                                | 0.011*                     | 0.004*                       | 0.296                    |
| PR status                                |                            | 0.001*                       |                          |
| Her2/neu                                 | 0.020*                     |                              |                          |

<sup>1</sup>The percentage of patients who were at least 50 years old was 74%, 28%, and 69% in the cohorts from Sotiriou *et al.* (1), van't Veer *et al.* (3), and Sorlie *et al.* (2), respectively.

To assess the therapeutic benefits for each risk group, average relapse-free survival days were compared for patients receiving adjuvant therapy in each group using the data from Sotiriou *et al.* (1). Specifically, therapeutic effects for patients receiving chemotherapy alone, hormonal therapy alone, or both chemo and hormone therapy were compared for each risk group. The observation in Table 9 is consistent with current clinical practice.

**Table S9.** Breast cancer therapeutic benefits assessment.

| Risk Group   | Average RFS (days) |                    |                    |
|--------------|--------------------|--------------------|--------------------|
|              | Chemo Alone        | Hormonal Alone     | Chemo + Hormonal   |
| High         | 613 (5 patients)   | 1005 (21 patients) | 1048 (10 patients) |
| Intermediate | 1478 (1 patient)   | 2496 (15 patients) | 2262 (7 patients)  |
| Low          | 3632 (4 patients)  | 2734 (20 patients) | 2545 (5 patients)  |

## References

1. Sotiriou C, Neo SY, McShane LM et al. Breast cancer classification and prognosis based on gene expression profiles from a population-based study. *Proc.Natl.Acad.Sci.U.S.A* 2003;100:10393-8.
2. Sorlie T, Perou CM, Tibshirani R et al. Gene expression patterns of breast carcinomas distinguish tumor subclasses with clinical implications. *Proc.Natl.Acad.Sci.U.S.A* 2001;98:10869-74.
3. 't Veer LJ, Dai H, van de Vijver MJ et al. Gene expression profiling predicts clinical outcome of breast cancer. *Nature* 2002;415:530-6.
4. Breiman L. Random Forests. *Machine Learning* 2001;45:5-32 .
5. Bioinformatics and Computational Biology Solutions, 1st ed. New York: Springer, 2005.
6. Breiman L. Bagging Predictors. *Machine Learning* 1996;24:123-40.
7. Diaz-Uriarte R, Alvarez dA. Gene selection and classification of microarray data using random forest. *BMC.Bioinformatics*. 2006;7:3.
8. Heagerty PJ, Lumley T, Pepe MS. Time-dependent ROC curves for censored survival data and a diagnostic marker. *Biometrics* 2000;56:337-44.
9. Heagerty PJ, Zheng Y. Survival model predictive accuracy and ROC curves. *Biometrics* 2005;61:92-105.
10. Cox D. Regression models and life-tables (with discussion). *Journal of the Royal Statistical Society, Series B, Methodological* 1972;34:187-220.
